# Supplementary material for: Effect of NiO Addition on the Sintering and Electrochemical Properties of BaCe0.55Zr0.35Y0.1O3-δ Proton-Conducting Ceramic Electrolyte
Source: MDPI journal article supplement (doi:10.3390/membranes14030061), 2024-02-27
Supplement: s1 [file s1]

## Supporting Information

### Effect of NiO Addition on the Sintering and Electrochemical Properties of $\text{BaCe}_{0.55}\text{Zr}_{0.35}\text{Y}_{0.1}\text{O}_{3-\delta}$ Proton-Conducting Ceramic Electrolyte

Chengxin Peng<sup>a,†</sup>, Bingxiang Zhao<sup>a,b,†</sup>, Xie Meng<sup>b</sup>, Xiaofeng Ye<sup>b,c</sup>, Ting Luo<sup>b</sup>, Xianshuang Xin<sup>b,c\*</sup>, Zhaoyin Wen<sup>b,c\*</sup>

<sup>a</sup> School of Materials and Chemistry, University of Shanghai for Science and Technology, Shanghai 200093, P. R. China

<sup>b</sup> The State Key Laboratory of High Performance Ceramics and Superfine Microstructure Shanghai Institute of Ceramics, Chinese Academy of Sciences, Shanghai 200050, P. R. China

<sup>c</sup> Center of Materials Science and Optoelectronics Engineering, University of Chinese Academy of Sciences, Beijing 100049, P. R. China

\* Corresponding authors: E-mail: xinxianshuang@mail.sic.ac.cn,

zywen@mail.sic.ac.cn

Table S1. Comparison of conductivity of BCZY, BCZY-0.5, BCZY-1.0 in air and H<sub>2</sub> at 600-700°C.

| $\sigma$ (mS cm <sup>-1</sup> ) | BCZY-0 |                | BCZY-0.5 |                | BCZY-1.0 |                |
|---------------------------------|--------|----------------|----------|----------------|----------|----------------|
|                                 | Air    | H <sub>2</sub> | Air      | H <sub>2</sub> | Air      | H <sub>2</sub> |
| 600°C                           | 1.5    | 2.3            | 6.7      | 8.4            | 6.6      | 7.7            |
| 650°C                           | 2.2    | 3.0            | 9.5      | 10.0           | 8.8      | 9.3            |
| 700°C                           | 3.0    | 3.7            | 12.2     | 11.3           | 11.3     | 10.8           |

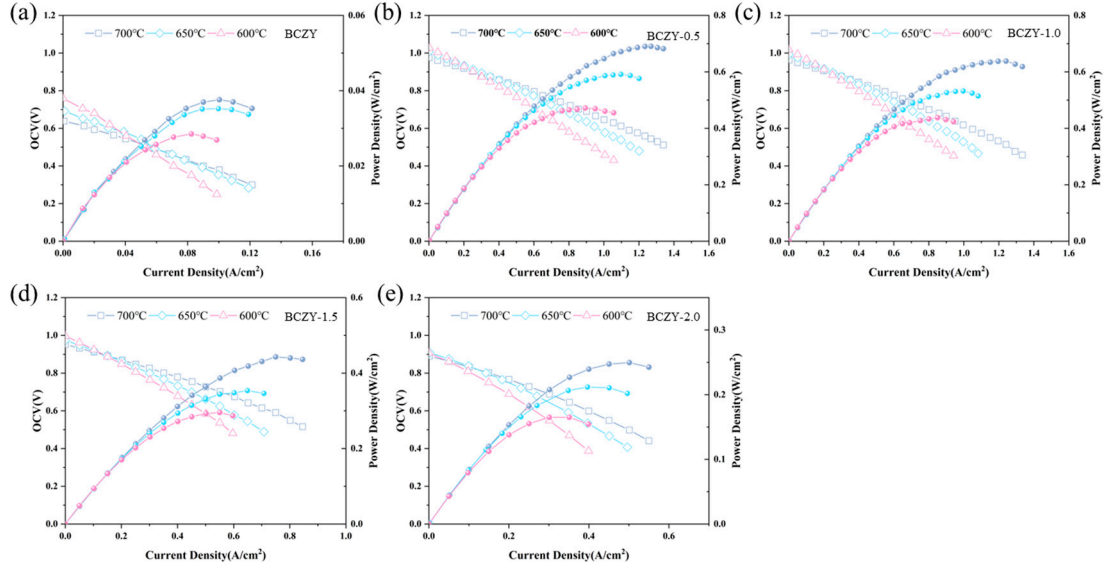

Figure S1. The single cell I-V and I-P diagrams of NiO-BCZY/BCZY-x ( $x=0, 0.5, 1.0, 1.5, 2.0$ )/BCZY-LSCF with a cell structure tested in 700°C、650°C and 600°C.

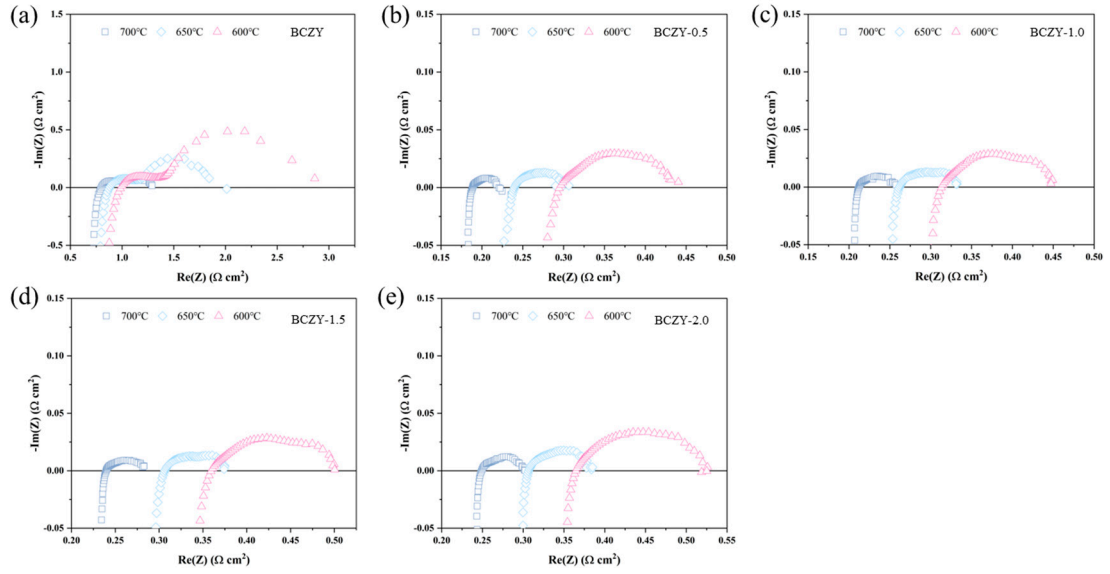

Figure S2. EIS diagrams of NiO-BCZY/BCZY-x ( $x=0, 0.5, 1.0, 1.5, 2.0$ )/BCZY-LSCF with a cell structure tested in 700°C、650°C and 600°C.

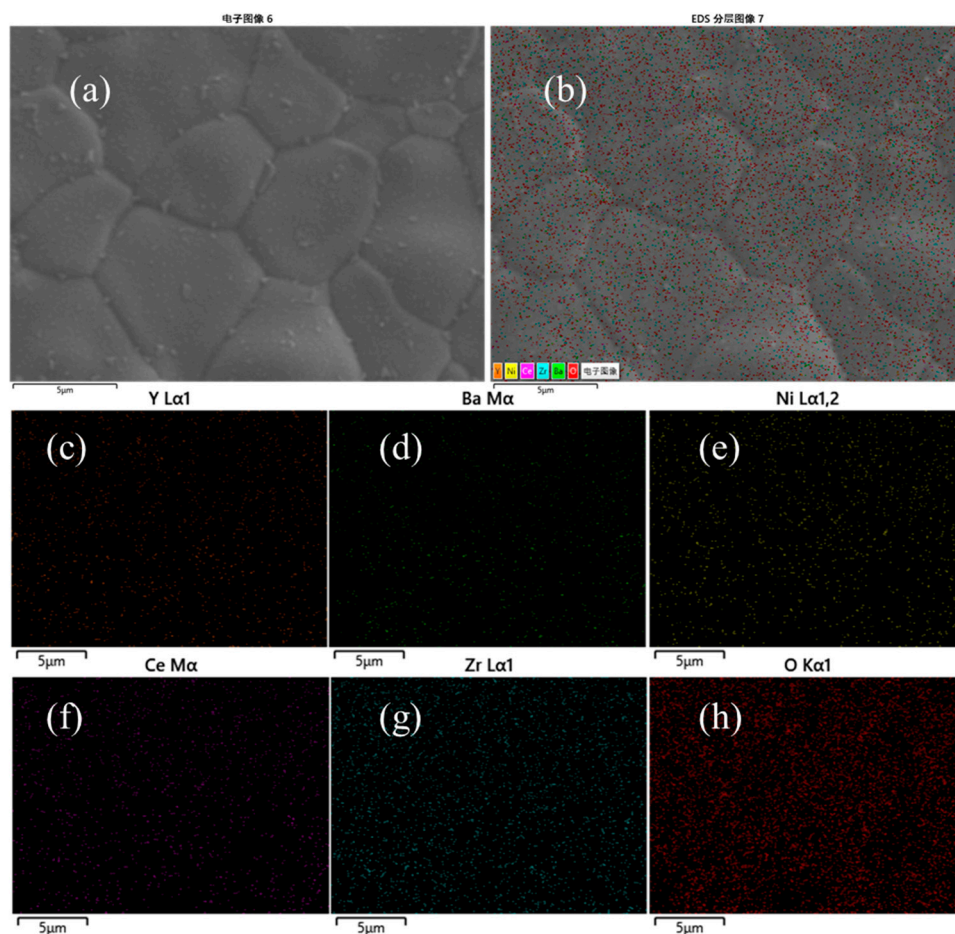

Figure S3. SEM-EDS mapping results for the surface of the BCZY-0.5 electrolyte membrane after testing (a)-(h).
